# Supplementary material
Source: Springer Nature journal article supplement (https://www.springermedizin.de/resource/supplementary/12885_2013_4492_MOESM1_ESM.pdf/9466502)

**a**

Negative CCR7 Positive CCR7

x40

x100

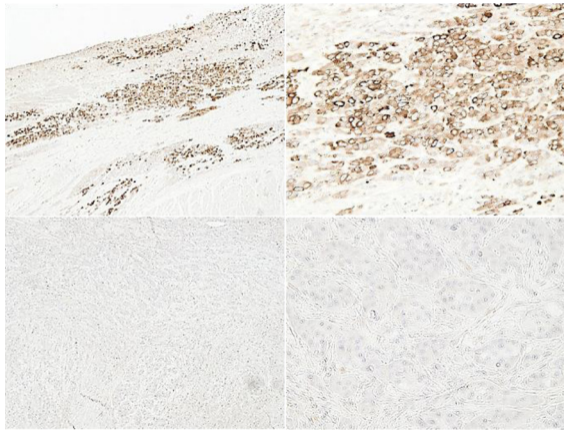**b**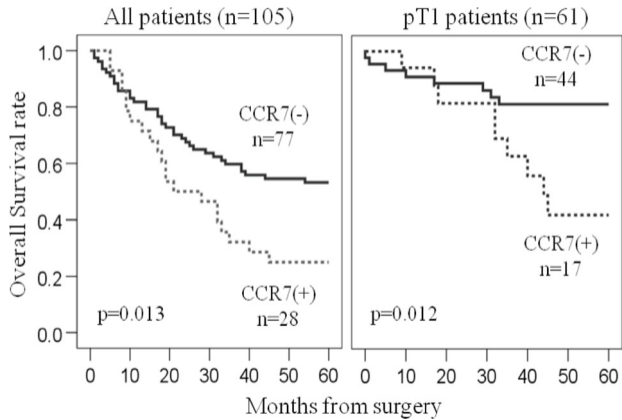

Supplement: MOESM1 [file 9466502]
